# Supplementary material for: Endophytic Fungi Residing within Cornus florida L. in Mid-Tennessee: Phylogenetic Diversity, Enzymatic Properties, and Potential Role in Plant Health
Source: MDPI journal article supplement (doi:10.3390/plants13091250), 2024-04-30
Supplement: s1 [file s1]

**Supplementary Table S4:** Summarized enzymatic index values for 50 endophytic fungi screened for six extracellular enzymes.

| Codes          | Enzymatic index |           |           |           |           |            |
|----------------|-----------------|-----------|-----------|-----------|-----------|------------|
|                | Cellulase       | Amylase   | Laccase   | Pectinase | Chitinase | Protease   |
| <b>A-A4F2</b>  | 0.14±0.04       | 0.5±0.04  | 0         | 0         | 0.6±0.09  | 0.46±0.05  |
| <b>A-A5F1</b>  | 0.45±0.01       | 0.54±0.1  | 1.0±0.2   | 0         | 0.14±0.02 | 0.13±0.03  |
| <b>A-A7F1</b>  | 4.13±0.25       | 1.1±0.18  | 3.0±0.2   | 0         | 0         | 0.48±0.04  |
| <b>A-A8F1</b>  | 0.07±0.01       | 0.08±0.0  | 0         | 0         | 0         | 0.03±0.01  |
| <b>A-A8F2</b>  | 0.32±0.05       | 0.19±0.04 | 0*        | 1.34±0.01 | 0         | 0.42±0.03  |
| <b>B-A11F1</b> | 0.86±0.03       | 0         | 0*        | 0.04±0.0  | 0.02±0.0  | 1.14±0.06  |
| <b>B-A13F1</b> | 0.22±0.03       | 0.2±0.15  | 0.3±0.05  | 0.06±0.03 | 0.04±0.0  | 2.8±0.6    |
| <b>B-A17F1</b> | 0.15±0.0        | 0.02±0.0  | 0         | 0         | 0.06±0.0  | 0          |
| <b>B-A17F2</b> | 1.4±0.25        | 0.55±0.3  | 1.1±0.16  | 0.55±0.12 | 0.2±0.01  | 3.7±0.06   |
| <b>B-A19F1</b> | 0.15±0.01       | 0         | 0         | 0         | 0.11±0.0  | 0.17±0.03  |
| <b>B-A20F1</b> | 0.9±0.22        | 2.2±0.4   | 0.02±0.04 | 0         | 0.16±0.02 | 3.4±0.06   |
| <b>C-A21F1</b> | 5.15±0.04       | 0         | 2.4±0.2   | 1.43±0.18 | 0         | 0.9±0.08   |
| <b>C-A22F1</b> | 0.06±0.01       | 0         | 0*        | 0.08±0.02 | 0         | 1.21±0.07  |
| <b>C-A22F4</b> | 2.18±0.11       | 4.0±0.34  | 0*        | 0         | 0         | 0.31±0.04  |
| <b>C-A23F2</b> | 1.35±0.03       | 1.6±0.3   | 0         | 0         | 0*        | 0.53±0.01  |
| <b>C-A24F2</b> | 3.74±0.19       | 1.14±0.16 | 0.7±0.03  | 0         | 0         | 1.1±0.07   |
| <b>C-A28F1</b> | 2.48±0.28       | 0         | 0         | 0.76±0.18 | 0         | 0.23±0.03  |
| <b>C-A29F1</b> | 1.4±0.15        | 0.8±0.25  | 0         | 0         | 0         | 0.15±0.0   |
| <b>D-A33F1</b> | 0.37±0.01       | 0.27±0.04 | 0         | 0         | 0*        | 0.05±0.013 |

|                 |            |           |            |           |           |            |
|-----------------|------------|-----------|------------|-----------|-----------|------------|
| <b>D-A33F4</b>  | 0.09±0.013 | 0         | 0          | 0         | 0*        | 0.01±0.0   |
| <b>D-A34F2</b>  | 0.02±0.003 | 0.5±0.06  | 0*         | 0.01±0.0  | 0*        | 2.57±0.7   |
| <b>D-A40F2</b>  | 0          | 0         | 0          | 0         | 0.03±0.0  | 0.05±0.01  |
| <b>E-A41F1</b>  | 0.03±0.0   | 0.33±0.02 | 0.02±0.02  | 0.3±0.06  | 0         | 2.21±0.34  |
| <b>E-A41F4</b>  | 0          | 0         | 0*         | 0*        | 0*        | 0.1±0.02   |
| <b>E-A42F1</b>  | 0.24±0.07  | 0         | 0.05±0.0   | 0.04±0.0  | 0         | 0.11±0.02  |
| <b>E-A42F4</b>  | 0.04±0.024 | 0         | 0.15±0.02  | 0*        | 0*        | 0.1±0.1    |
| <b>E-A42F5</b>  | 0.4±0.02   | 0.14±0.03 | 0.24±0.04  | 0*        | 0         | 0.14±0.02  |
| <b>E-A43F3</b>  | 0.04±0.01  | 0         | 0          | 0         | 0*        | 0.16±0.015 |
| <b>E-A43F4</b>  | 0          | 0         | 0          | 0         | 0         | 0*         |
| <b>E-A44F1</b>  | 0.26±0.05  | 0.12±0.02 | 0.04±0.015 | 0         | 0.02±0.0  | 0.16±0.04  |
| <b>E-A44F4</b>  | 0          | 0         | 0*         | 0.23±0.02 | 0         | 0.11±0.02  |
| <b>E-A46F1</b>  | 0          | 0         | 0*         | 0.02±0.0  | 0.1±0.002 | 0.11±0.04  |
| <b>E-A46F2</b>  | 0          | 0         | 0*         | 0.02±0.01 | 0*        | 0.06±0.006 |
| <b>E-A46F3</b>  | 0.1±0.09   | 0         | 0.06±0.03  | 0         | 0         | 1.2±0.9    |
| <b>E-A47F1</b>  | 0          | 0         | 0*         | 0         | 0*        | 0.31±0.02  |
| <b>E-A47F4</b>  | 0.57±0.02  | 1.05±0.3  | 0.6±0.24   | 0         | 0*        | 0.07±0.02  |
| <b>E-A47F6</b>  | 5.4±0.2    | 1.5±0.04  | 3.5±0.04   | 0         | 0         | 0.9±0.08   |
| <b>E-A48F7</b>  | 0.2±0.06   | 0.54±0.06 | 0.2±0.03   | 0         | 0.11±0.16 | 0.4±0.14   |
| <b>E-A48F9</b>  | 1.36±0.05  | 0.13±0.04 | 0          | 0.5±0.1   | 0         | 1.0±0.04   |
| <b>E-A48F10</b> | 0.05±0.0   | 0         | 0.1±0.07   | 0.04±0.02 | 0         | 0.9±0.11   |
| <b>E-A48F12</b> | 0.3±0.03   | 0.24±0.1  | 0.1±0.01   | 0.11±0.01 | 0         | 0.13±0.01  |
| <b>E-A50F1</b>  | 0          | 0         | 0          | 0         | 0         | 0          |
| <b>F-A53F2</b>  | 0          | 0         | 0*         | 0.09±0.01 | 0.07±0.14 | 1.3±0.4    |
| <b>H-A56F4</b>  | 0          | 0         | 0*         | 0         | 0         | 0.24±0.02  |
| <b>H-A60F2</b>  | 0          | 0         | 0*         | 0.06±0.03 | 0.1±0.04  | 0.4±0.1    |
| <b>F-A62F1</b>  | 0.8±0.08   | 0.5±0.03  | 0*         | 0.09±0.0  | 0.11±0.02 | 0.07±0.02  |
| <b>F-A63F3</b>  | 3.63±0.08  | 0         | 0          | 0         | 0         | 0.33±0.0   |
| <b>G-A68F2</b>  | 0.16±0.0   | 0.6±0.3   | 0          | 1.6±0.3   | 0         | 0.19±0.05  |
| <b>G-A71F3</b>  | 0.6±0.15   | 0.84±0.07 | 0          | 1.2±0.11  | 0*        | 0.63±0.14  |
| <b>G-A72F3</b>  | 0          | 0.23±0.03 | 0*         | 0         | 0         | 0.2±0.04   |

Data shown are representative of two independent experiments performed in four replicated (means  $\pm$  standard deviation) with similar results from the two experiments
