# Supplementary material for: Endophytic Fungi Residing within Cornus florida L. in Mid-Tennessee: Phylogenetic Diversity, Enzymatic Properties, and Potential Role in Plant Health
Source: MDPI journal article supplement (doi:10.3390/plants13091250), 2024-04-30
Supplement: s1 [file s1]

**Supplementary Table S2:** Relative frequency distribution of endophytic fungal communities isolated from *C. florida* stem collected from eight different locations in middle Tennessee.

|                                    | Relative frequency (%) at A-H locations <sup>z</sup> |      |      |      |      |      |      |      | Mean        |
|------------------------------------|------------------------------------------------------|------|------|------|------|------|------|------|-------------|
|                                    | A                                                    | B    | C    | D    | E    | F    | G    | H    |             |
| <b>Ascomycota (96.5)</b>           |                                                      |      |      |      |      |      |      |      |             |
| <b>Sordariomycetes (49.3)</b>      |                                                      |      |      |      |      |      |      |      |             |
| <b>Xylariales</b>                  | 71.1                                                 | 71.1 | 50.9 | 59.4 | 43.9 | 27.7 | 10.0 | 23.1 | <b>43.9</b> |
| <i>Annulohypoxylon annulatum</i>   | -                                                    | -    | -    | 18.8 | -    | -    | -    | -    | <b>1.6</b>  |
| <i>Daldinia childiae</i>           | -                                                    | 11.1 | 5.7  | 12.5 | 8.8  | -    | -    | -    | <b>4.6</b>  |
| <i>Hypoxylon</i> sp.               | 5.3                                                  | -    | 1.9  | 3.1  | 5.3  | 1.5  | -    | -    | <b>2.2</b>  |
| <i>Hypoxylon fragiforme</i>        | -                                                    | -    | -    | 3.1  | 1.8  | -    | -    | -    | <b>0.54</b> |
| <i>Hypoxylon fuscum</i>            | -                                                    | -    | 1.9  | -    | -    | -    | -    | -    | <b>0.27</b> |
| <i>Hypoxylon howeanum</i>          | -                                                    | 11.1 | -    | -    | -    | -    | -    | -    | <b>1.4</b>  |
| <i>Hypoxylon perforatum</i>        | 10.5                                                 | 2.2  | 11.3 | 6.3  | 5.3  | 3.1  | -    | 5.1  | <b>5.4</b>  |
| <i>Hypoxylon rubiginosum</i>       | -                                                    | 2.2  | 3.8  | -    | -    | -    | -    | -    | <b>0.81</b> |
| <i>Hypoxylon submonticulosum</i>   | -                                                    | -    | 1.9  | 3.1  | -    | -    | -    | -    | <b>0.54</b> |
| <i>Nemania</i> sp.                 | -                                                    | 6.7  | -    | -    | -    | -    | -    | -    | <b>0.81</b> |
| <i>Nemania serpens</i>             | -                                                    | -    | -    | 9.4  | -    | -    | -    | -    | <b>0.81</b> |
| <i>Pestalotiopsis</i> sp.          | -                                                    | -    | 15.1 | -    | -    | -    | 5.0  | 2.6  | <b>3.0</b>  |
| <i>Pestalotiopsis hainanensis</i>  | -                                                    | -    | -    | -    | -    | 6.2  | -    | -    | <b>1.1</b>  |
| <i>Pestalotiopsis mangiferae</i>   | -                                                    | -    | -    | -    | -    | -    | 5.0  | -    | <b>0.54</b> |
| <i>Pestalotiopsis microspora</i>   | 23.7                                                 | -    | -    | -    | 5.3  | 7.7  | -    | 5.1  | <b>5.2</b>  |
| <i>Pestalotiopsis vismiae</i>      | -                                                    | -    | -    | -    | 1.8  | -    | -    | 7.7  | <b>1.1</b>  |
| <i>Rosellinia corticium</i>        | -                                                    | 2.2  | -    | -    | -    | -    | -    | -    | <b>0.27</b> |
| <i>Seimatosporium lichenicola</i>  | 7.9                                                  | -    | 3.8  | -    | 8.8  | 1.5  | -    | -    | <b>3.0</b>  |
| <i>Seiridium</i> sp.               | -                                                    | -    | -    | -    | -    | -    | -    | 2.6  | <b>0.27</b> |
| <i>Whalleya microplaca</i>         | -                                                    | 20.0 | 1.9  | -    | 3.5  | -    | -    | -    | <b>3.3</b>  |
| <i>Xylaria</i> sp.                 | 5.3                                                  | 15.6 | -    | 3.1  | 1.8  | 7.7  | -    | -    | <b>4.4</b>  |
| <i>Xylaria</i> cf. <i>heliscus</i> | -                                                    | -    | 5.7  | -    | 1.8  | -    | -    | -    | <b>1.1</b>  |

|                                                 |      |      |      |      |      |      |      |      |      |
|-------------------------------------------------|------|------|------|------|------|------|------|------|------|
| Unclassified                                    | 18.4 | -    | -    | -    | -    | -    | -    | -    | 1.9  |
| Xylariales                                      |      |      |      |      |      |      |      |      |      |
| Diaporthales                                    | 5.3  | -    | -    | -    | 5.3  | 3.1  | -    | 5.1  | 2.43 |
| <i>Cytospora</i> sp.                            | 5.3  | -    | -    | -    | -    | 1.5  | -    | 5.1  | 1.4  |
| <i>Diaporthe</i> cf.<br><i>nobilis</i>          | -    | -    | -    | -    | 3.5  | -    | -    | -    | 0.54 |
| <i>Diaporthe</i> sp.                            | -    | -    | -    | -    | 1.8  | -    | -    | -    | 0.27 |
| <i>Valsa sordida</i>                            | -    | -    | -    | -    | -    | 1.5  | -    | -    | 0.27 |
| Glomerellales                                   | -    | -    | -    | -    | 3.5  | -    | -    | -    | 0.54 |
| <i>Colletotrichum</i><br><i>acutatum</i>        | -    | -    | -    | -    | 1.8  | -    | -    | -    | 0.27 |
| <i>Colletotrichum</i><br><i>gloeosporioides</i> | -    | -    | -    | -    | 1.8  | -    | -    | -    | 0.27 |
| Trichosphaeriales                               | -    | -    | 5.7  | -    | -    | 4.6  | 2.5  | -    | 1.9  |
| <i>Nigrospora</i><br><i>sphaerica</i>           | -    | -    | 5.7  | -    | -    | 4.6  | 2.5  | -    | 1.9  |
| Xylomelasma                                     |      |      |      |      |      |      |      |      |      |
| <i>Xylomelasma</i> sp.                          | -    | -    | -    | -    | 1.8  | -    | -    | -    | 0.27 |
| Dothideomycetes (45.5)                          |      |      |      |      |      |      |      |      |      |
| Dothideales                                     | 2.6  | -    | 20.7 | 9.4  | -    | -    | 2.5  | -    | 4.4  |
| <i>Coniozyma</i> sp.                            | -    | -    | -    | 9.4  | -    | -    | -    | -    | 0.81 |
| Dothideales sp.                                 | 2.6  | -    | 20.7 | -    | -    | -    | 2.5  | -    | 4.4  |
| Botryosphaeriales                               | 10.5 | -    | -    | 18.8 | 7.0  | -    | -    | 5.1  | 4.3  |
| <i>Botryosphaeria</i><br><i>dothidea</i>        | 10.5 | -    | -    | -    | -    | -    | -    | -    | 1.1  |
| <i>Diplodia seriata</i>                         | -    | -    | -    | 18.8 | 5.3  | -    | -    | 5.1  | 3.0  |
| <i>Phyllosticta</i><br><i>pyrolae</i>           | -    | -    | -    | -    | 1.8  | -    | -    | -    | 0.27 |
| Pleosporales                                    | -    | 28.9 | 1.9  | 3.1  | 31.6 | 63.1 | 82.5 | 56.4 | 34.9 |
| <i>Alternaria</i><br><i>alternata</i>           | -    | -    | -    | -    | 1.8  | -    | -    | -    | 0.27 |
| <i>Ascochyta</i><br><i>medicaginicola</i>       | -    | -    | 1.9  | -    | -    | 3.1  | 10.0 | 5.1  | 2.7  |
| <i>Coniothyrium</i> sp.                         | -    | -    | -    | -    | -    | 10.8 | 7.5  | -    | 2.4  |
| <i>Didymella</i> sp.                            | -    | -    | -    | -    | -    | 15.4 | 2.5  | -    | 3.0  |
| <i>Didymella</i><br><i>glomerata</i>            | -    | -    | -    | -    | -    | 15.4 | 30.0 | 10.3 | 7.1  |
| <i>Didymosphaeria</i><br><i>variabile</i>       | -    | 28.9 | -    | 3.1  | 26.3 | 3.1  | 12.5 | 12.8 | 11.1 |
| <i>Epicoccum</i><br><i>nigrum</i>               | -    | -    | -    | -    | -    | 4.6  | -    | -    | 0.81 |
| <i>Nothophoma</i><br><i>quercina</i>            | -    | -    | -    | -    | -    | 7.7  | 5.0  | -    | 2.2  |
| <i>Paraconiothyrium</i><br><i>brasiliense</i>   | -    | -    | -    | -    | 1.8  | 1.5  | -    | 15.4 | 2.2  |

|                                               |      |   |      |     |     |     |     |      |             |
|-----------------------------------------------|------|---|------|-----|-----|-----|-----|------|-------------|
| <i>Pleosporales</i> sp.                       | -    | - | -    | -   | -   | 1.5 | 7.5 | -    | <b>1.4</b>  |
| <i>Phoma</i> sp.                              | -    | - | -    | -   | -   | -   | -   | 10.3 | <b>1.1</b>  |
| <i>Phoma aliena</i>                           | -    | - | -    | -   | -   | -   | 2.5 | 2.6  | <b>0.54</b> |
| <b>Capnodiales</b>                            | -    | - | 13.2 | 3.1 | -   | -   | -   | -    | <b>2.2</b>  |
| <i>Cladosporium</i><br><i>cladosporioides</i> | -    | - | 13.2 | -   | -   | -   | -   | -    | <b>1.9</b>  |
| <i>Mycosphaerella</i><br><i>aurantia</i>      | -    | - | -    | 3.1 | -   | -   | -   | -    | <b>0.27</b> |
| <b>Leotiomycetes (1.4)</b>                    |      |   |      |     |     |     |     |      |             |
| <b>Phacidiales</b>                            | -    | - | -    | -   | -   | -   | 2.5 | 10.3 | <b>1.4</b>  |
| <i>Ceuthospora</i><br><i>pinastri</i>         | -    | - | -    | -   | -   | -   | 2.5 | 10.3 | <b>1.4</b>  |
| <b>Basidiomycota (3.0)</b>                    |      |   |      |     |     |     |     |      |             |
| <b>Agaricomycetes (2.4)</b>                   |      |   |      |     |     |     |     |      |             |
| <b>Polyporales</b>                            | 10.5 | - | -    | -   | -   | -   | -   | -    | <b>1.1</b>  |
| <i>Bjerkandera</i><br><i>adusta</i>           | 7.9  | - | -    | -   | -   | -   | -   | -    | <b>0.81</b> |
| <i>Polyporales</i> sp.                        | 2.6  | - | -    | -   | -   | -   | -   | -    | <b>0.27</b> |
| <b>Russulales</b>                             | -    | - | 1.9  | -   | 7.0 | -   | -   | -    | <b>1.4</b>  |
| <i>Peniophora</i> cf.<br><i>limitata</i>      | -    | - | -    | -   | 3.5 | -   | -   | -    | <b>0.54</b> |
| <i>Peniophora lycii</i>                       | -    | - | 1.9  | -   | -   | -   | -   | -    | <b>0.27</b> |
| <i>Stereum</i><br><i>complicatum</i>          | -    | - | -    | -   | 3.5 | -   | -   | -    | <b>0.54</b> |
| <b>Basidiomycetes</b> sp.                     | -    | - | 3.8  | -   | -   | -   | -   | -    | <b>0.54</b> |
| <b>Unknown (0.81)</b>                         |      |   |      |     |     |     |     |      |             |
| <b>Fungal sp. A36F2 (0.54)</b>                |      |   |      |     |     |     |     |      |             |
| <b>Fungal sp. A52F2 (0.27)</b>                |      |   |      |     |     |     |     |      |             |

<sup>z</sup>Locations A-H, in which location A-E are in Warren County (McMinnville), F and G in Davidson County (Nashville) and H is a Rutherford county (Murfreesboro) location.
