# Supplementary material for: Endophytic Fungi Residing within Cornus florida L. in Mid-Tennessee: Phylogenetic Diversity, Enzymatic Properties, and Potential Role in Plant Health
Source: MDPI journal article supplement (doi:10.3390/plants13091250), 2024-04-30
Supplement: s1 [file s1]

**Supplementary Table S1:** Overview of endophytic fungi isolated from the stem of *C. florida* including their family, closest hit in BLASTn search with GeneBank Accession number and percentage similarity based on ITS analysis.

| ID      | Identification                    | Family                     | Closest GeneBank match/Accession               | Similarity bp      |
|---------|-----------------------------------|----------------------------|------------------------------------------------|--------------------|
| A3F1    | <i>Xylariales</i> sp.             | Unclassified<br>Xylariales | <i>Xylariales</i> sp.<br>(HQ608051)            | 492/504<br>(97.6%) |
| A4F1    | <i>Dothideales</i> sp.            | Unassigned                 | <i>Dothideales</i> sp.<br>(JX188157)           | 520/536<br>(97%)   |
| A-A4F2  | <i>Hypoxylon</i> sp.              | Hypoxylaceae               | <i>Hypoxylon</i> sp.<br>(KX722238)             | 518/526<br>(98.5%) |
| A-A5F1  | <i>Hypoxylon perforatum</i>       | Hypoxylaceae               | <i>Hypoxylon perforatum</i><br>(JQ009306)      | 573/575<br>(99.6%) |
| A-A5F2  | <i>Xylaria</i> sp.                | Xylariaceae                | <i>Xylaria</i> sp.<br>(JQ761738)               | 716/717<br>(99.9%) |
| A-A7F1  | <i>Seimatosporium lichenicola</i> | Amphisphaeriaceae          | <i>Discostroma fuscillum</i><br>(JF320818)     | 550/558<br>(98.6%) |
| A-A8F1  | <i>Botryosphaeria dothidea</i>    | Botryosphaeriales          | <i>Botryosphaeria dothidea</i><br>(KX648519)   | 539/539<br>(100%)  |
| A-A8F2  | <i>Pestalotiopsis microspora</i>  | Sporocadaceae              | <i>Pestalotiopsis microspora</i><br>(KM438014) | 484/484<br>(100%)  |
| A-A9F1  | <i>Polyporales</i> sp.            | Unassigned                 | <i>Flavodon flavus</i><br>(KY703429)           | 232/256<br>(90.6%) |
| A-A9F2  | <i>Cytospora</i> sp.              | Valsaceae                  | <i>Cytospora</i> sp.<br>(AY188991)             | 550/552<br>(99.6%) |
| A-A10F1 | <i>Bjerkandera adusta</i>         | Phanerochaetaceae          | <i>Bjerkandera adusta</i><br>(KC176334)        | 572/573<br>(99.8%) |
| B-A11F1 | <i>Didymosphaeria variabile</i>   | Didymosphaeriaceae         | <i>Didymosphaeria variabile</i><br>(KX869961)  | 559/559<br>(100%)  |
| B-A12F1 | <i>Daldinia childiae</i>          | Hypoxylaceae               | <i>Daldinia childiae</i><br>(KU683757)         | 547/557<br>(98.2%) |
| B-A12F2 | <i>Hypoxylon rubiginosum</i>      | Hypoxylaceae               | <i>Hypoxylon rubiginosum</i><br>(JQ760786)     | 566/577<br>(98.1%) |

|                |                                       |                    |                                                   |                    |
|----------------|---------------------------------------|--------------------|---------------------------------------------------|--------------------|
| <b>B-A13F1</b> | <i>Nemania</i> sp.                    | Xylariaceae        | <i>Nemania</i> sp.<br>(JQ760461)                  | 539/541<br>(99.6%) |
| <b>B-A15F1</b> | <i>Didymosphaeria<br/>variabile</i>   | Didymosphaeriaceae | <i>Didymosphaeria<br/>variabile</i><br>(KX869961) | 553/554<br>(99.8%) |
| <b>B-A17F1</b> | <i>Whalleya<br/>microplaca</i>        | Xylariaceae        | <i>Whalleya microplaca</i><br>(EF026129)          | 554/559<br>(99.1%) |
| <b>B-A17F2</b> | <i>Rosellinia corticium</i>           | Xylariaceae        | <i>Rosellinia corticium</i><br>(KC311485)         | 523/528<br>(99%)   |
| <b>B-A19F1</b> | <i>Xylaria</i> sp.                    | Xylariaceae        | <i>Xylaria</i> sp.<br>(KU683939)                  | 749/750<br>(99.9%) |
| <b>B-A20F1</b> | <i>Hypoxylon<br/>perforatum</i>       | Hypoxylaceae       | <i>Hypoxylon<br/>perforatum</i><br>(KY950447)     | 575/578<br>(99.5%) |
| <b>B-A20F2</b> | <i>Hypoxylon<br/>howeanum</i>         | Hypoxylaceae       | <i>Hypoxylon<br/>howeanum</i><br>(HE774495)       | 571/574<br>(99.5%) |
| <b>C-A21F1</b> | <i>Seimatosporium<br/>lichenicola</i> | Amphisphaeriaceae  | <i>Discostroma<br/>fuscillum</i><br>(JF320818)    | 519/528<br>(98.3%) |
| <b>C-A21F2</b> | <i>Dothideales</i> sp.                | Unassigned         | <i>Dothideales</i> sp.<br>JX188157                | 541/558<br>(96.9%) |
| <b>C-A22F1</b> | <i>Nigrospora<br/>sphaerica</i>       | Trichosphaeriales  | <i>Nigrospora sphaerica</i><br>(KF171529)         | 494/495<br>(99.8%) |
| <b>C-A22F2</b> | <i>Hypoxylon<br/>perforatum</i>       | Hypoxylaceae       | <i>Hypoxylon<br/>perforatum</i><br>(KY950447)     | 587/593<br>(99%)   |
| <b>C-A22F3</b> | <i>Peniophora lycii</i>               | Peniophoraceae     | <i>Peniophora lycii</i><br>(JX046435)             | 586/592<br>(99%)   |
| <b>C-A22F4</b> | Basidiomycota sp.                     | Unassigned         | Basidiomycota sp.<br>(GU566231)                   | 586/593<br>(98.8%) |
| <b>C-A23F1</b> | <i>Daldinia childiae</i>              | Hypoxylaceae       | <i>Daldinia childiae</i><br>(KU683757)            | 512/513<br>(99.8%) |
| <b>C-A23F2</b> | <i>Hypoxylon fuscum</i>               | Hypoxylaceae       | <i>Hypoxylon fuscum</i><br>(JN979424)             | 553/566<br>(97.7%) |
| <b>C-A23F3</b> | <i>Whalleya<br/>microplaca</i>        | Xylariaceae        | <i>Whalleya microplaca</i><br>(EF026129)          | 565/571<br>(98.9%) |
| <b>C-A24F1</b> | <i>Pestalotiopsis</i> sp.             | Sporocadaceae      | <i>Pestalotiopsis</i> sp.<br>(KJ542337)           | 621/624<br>(99.5%) |
| <b>C-A24F2</b> | <i>Dothideales</i> sp.                | Unassigned         | <i>Dothideales</i> sp.<br>(JX188157)              | 539/559<br>(96.4%) |

|                |                                     |                    |                                                   |                    |
|----------------|-------------------------------------|--------------------|---------------------------------------------------|--------------------|
| <b>C-A26F2</b> | <i>Hypoxylon rubiginosum</i>        | Hypoxylaceae       | <i>Hypoxylon rubiginosum</i><br>(MH178694)        | 505/511<br>(98.8%) |
| <b>C-A26F3</b> | <i>Hypoxylon submonticulosum</i>    | Hypoxylaceae       | <i>Hypoxylon submonticulosum</i><br>(MG004779)    | 518/519<br>(99.8%) |
| <b>C-A26F4</b> | <i>Hypoxylon perforatum</i>         | Hypoxylaceae       | <i>Hypoxylon perforatum</i><br>(KY950447)         | 572/575<br>(99.5%) |
| <b>C-A26F5</b> | <i>Hypoxylon rubiginosum</i>        | Hypoxylaceae       | <i>Hypoxylon rubiginosum</i><br>(MH178694)        | 505/510<br>(99%)   |
| <b>C-A26F8</b> | <i>Hypoxylon</i> sp.                | Hypoxylaceae       | <i>Hypoxylon</i> sp.<br>(KX722238)                | 526/535<br>(98.3%) |
| <b>C-A27F1</b> | <i>Hypoxylon perforatum</i>         | Hypoxylaceae       | <i>Hypoxylon perforatum</i><br>(KY950447)         | 563/570<br>(98.8%) |
| <b>C-A27F2</b> | <i>Ascochyta medicaginicola</i>     | Didymellaceae      | <i>Ascochyta medicaginicola</i><br>(KX065046)     | 498/500<br>(99.6%) |
| <b>C-A27F3</b> | <i>Dothideales</i> sp.              | Unassigned         | <i>Dothideales</i> sp.<br>(JX188157)              | 527/544<br>(96.9%) |
| <b>C-A28F1</b> | <i>Cladosporium cladosporioides</i> | Cladosporiaceae    | <i>Cladosporium cladosporioides</i><br>(MF472939) | 481/481<br>(100%)  |
| <b>C-A30F1</b> | <i>Xylaria</i> cf. <i>heliscus</i>  | Xylariaceae        | <i>Xylaria</i> cf. <i>heliscus</i><br>(JQ761642)  | 514/514<br>(100%)  |
| <b>D-A31F1</b> | <i>Hypoxylon fragiforme</i>         | Hypoxylaceae       | <i>Hypoxylon fragiforme</i><br>(KU684022)         | 556/565<br>(98.4%) |
| <b>D-A31F2</b> | <i>Mycosphaerella aurantia</i>      | Mycosphaerellaceae | <i>Mycosphaerella aurantia</i><br>(EU851913)      | 487/489<br>(99.6%) |
| <b>D-A32F1</b> | <i>Coniozyma</i> sp.                | Dothideaceae       | <i>Coniozyma</i> sp.<br>(KF646090)                | 526/539<br>(97.6%) |
| <b>D-A33F1</b> | <i>Daldinia childiae</i>            | Hypoxylaceae       | <i>Daldinia childiae</i><br>(KU683757)            | 520/521<br>(99.8%) |
| <b>D-A33F4</b> | <i>Daldinia childiae</i>            | Hypoxylaceae       | <i>Daldinia childiae</i><br>(KU683757)            | 511/512<br>(99.8%) |
| <b>D-A34F1</b> | <i>Diplodia seriata</i>             | Botryosphaeriales  | <i>Diplodia seriata</i><br>(KR822800)             | 542/544<br>(99.6%) |

|         |                                       |                    |                                                     |                    |
|---------|---------------------------------------|--------------------|-----------------------------------------------------|--------------------|
| D-A34F2 | <i>Nemania serpens</i>                | Xylariaceae        | <i>Nemania serpens</i><br>(KU683860)                | 619/623<br>(99.4%) |
| D-A35F1 | <i>Hypoxylon perforatum</i>           | Hypoxylaceae       | <i>Hypoxylon perforatum</i><br>(JQ009308)           | 570/579<br>(98.5%) |
| D-A35F2 | <i>Hypoxylon perforatum</i>           | Hypoxylaceae       | <i>Hypoxylon perforatum</i><br>(JQ009308)           | 513/518<br>(99%)   |
| D-A35F3 | <i>Hypoxylon</i> sp.                  | Hypoxylaceae       | <i>Hypoxylon</i> sp.<br>(JQ761436)                  | 612/615<br>(99.5%) |
| D-A36F2 | Fungal sp.                            | Unassigned         | Uncultured fungus<br>clone<br>(KF800545)            | 382/452<br>(84.5%) |
| D-A37F1 | <i>Didymosphaeria variabile</i>       | Didymosphaeriaceae | <i>Didymosphaeria variabile</i><br>(KX869961)       | 561/561<br>(100%)  |
| D-A37F2 | <i>Xylaria</i> sp.                    | Xylariaceae        | <i>Xylaria</i> sp.<br>(JQ761730)                    | 719/722<br>(99.6%) |
| D-A38F1 | <i>Daldinia childiae</i>              | Hypoxylaceae       | <i>Daldinia childiae</i><br>(KU683757)              | 455/470<br>(96.8%) |
| D-A40F1 | <i>Annulohypoxylon annulatum</i>      | Hypoxylaceae       | <i>Annulohypoxylon annulatum</i><br>(NR_153579)     | 455/463<br>(98.3%) |
| D-A40F2 | <i>Nemania serpens</i>                | Xylariaceae        | <i>Nemania serpens</i><br>(MG004726)                | 527/527<br>(100%)  |
| D-A40F3 | <i>Hypoxylon submonticulosum</i>      | Hypoxylaceae       | <i>Hypoxylon submonticulosum</i><br>(MG004779)      | 514/516<br>(99.6%) |
| E-A41F1 | <i>Colletotrichum acutatum</i>        | Glomerellaceae     | <i>Colletotrichum acutatum</i><br>(KM520005)        | 530/534<br>(99.3%) |
| E-A41F3 | <i>Hypoxylon</i> sp.                  | Hypoxylaceae       | <i>Hypoxylon</i> sp.<br>(MH178703)                  | 512/515<br>(99.4%) |
| E-A41F4 | <i>Colletotrichum gloeosporioides</i> | Glomerellaceae     | <i>Colletotrichum gloeosporioides</i><br>(KX578792) | 535/540<br>(99.1%) |
| E-A42F1 | <i>Diaporthe</i> sp.                  | Diaporthaceae      | <i>Diaporthe</i> sp.<br>(KU375739)                  | 536/539<br>(99.4%) |
| E-A42F3 | <i>Pleosporales</i> sp.               | Unassigned         | <i>Camarographium koreanum</i><br>(JQ044432)        | 451/503<br>(89.7%) |

|         |                                     |                    |                                                   |                    |
|---------|-------------------------------------|--------------------|---------------------------------------------------|--------------------|
| E-A42F4 | <i>Xylaria cf. heliscus</i>         | Xylariaceae        | <i>Xylaria cf. heliscus</i><br>(JQ761642)         | 540/548<br>(98.5%) |
| E-A42F5 | <i>Stereum complicatum</i>          | Stereaceae         | <i>Stereum complicatum</i><br>(KU559368)          | 569/573<br>(99.3%) |
| E-A43F1 | <i>Daldinia childiae</i>            | Hypoxylaceae       | <i>Daldinia childiae</i><br>(KU683757)            | 532/536<br>(99.3%) |
| E-A43F2 | <i>Hypoxylon</i> sp.                | Hypoxylaceae       | <i>Hypoxylon perforatum</i><br>(KM513593)         | 577/605<br>(95.4%) |
| E-A43F4 | <i>Diplodia seriata</i>             | Botryosphaeriales  | <i>Diplodia seriata</i><br>(KT004551)             | 535/536<br>(99.8%) |
| E-A44F1 | <i>Pestalotiopsis microspora</i>    | Sporocadaceae      | <i>Pestalotiopsis microspore</i><br>(GU441590)    | 535/535<br>(100%)  |
| E-A44F2 | <i>Pestalotiopsis vismiae</i>       | Sporocadaceae      | <i>Pestalotiopsis vismiae</i><br>(KY810494)       | 545/545<br>(100%)  |
| E-A44F3 | <i>Stereum complicatum</i>          | Stereaceae         | <i>Stereum complicatum</i><br>(KU559368)          | 556/559<br>(99.5%) |
| E-A44F4 | <i>Paraconiothyrium brasiliense</i> | Didymosphaeriaceae | <i>Paraconiothyrium Brasiliense</i><br>(JF439492) | 553/553<br>(100%)  |
| E-A45F1 | <i>Didymosphaeria variabile</i>     | Didymosphaeriaceae | <i>Didymosphaeria variabile</i><br>(KX8699610)    | 555/558<br>(99.5%) |
| E-A46F1 | <i>Diaporthe cf. nobilis</i>        | Diaporthaceae      | <i>Diaporthe cf. nobilis</i><br>(KC3431480)       | 464/466<br>(99.6%) |
| E-A46F2 | <i>Xylaria</i> sp.                  | Xylariaceae        | <i>Xylaria</i> sp.<br>(AB449101)                  | 486/505<br>(96.2%) |
| E-A46F3 | <i>Pestalotiopsis microspora</i>    | Sporocadaceae      | <i>Pestalotiopsis microspore</i><br>(KM041703)    | 500/501<br>(99.8%) |
| E-A47F1 | <i>Peniophora cf. limitata</i>      | Peniophoraceae     | <i>Peniophora cf. limitata</i><br>(KP814438)      | 561/568<br>(98.8%) |
| E-A47F2 | <i>Hypoxylon perforatum</i>         | Hypoxylaceae       | <i>Hypoxylon perforatum</i><br>(KJ957773)         | 523/530<br>(98.7%) |
| E-A47F4 | <i>Xylomelasma</i> sp.              | Unassigned         | <i>Xylomelasma</i> sp.<br>(FR837913)_             | 552/556<br>(99.3%) |

|          |                                   |                    |                                                 |                    |
|----------|-----------------------------------|--------------------|-------------------------------------------------|--------------------|
| E-A47F5  | <i>Hypoxylon fragiforme</i>       | Hypoxylaceae       | <i>Hypoxylon fragiforme</i><br>(KU684022)       | 576/576<br>(100%)  |
| E-A47F6  | <i>Seimatosporium lichenicola</i> | Amphisphaeriaceae  | <i>Discostroma fuscillum</i><br>(JF320818)      | 545/552<br>(98.7%) |
| E-A48F1  | <i>Daldinia childiae</i>          | Hypoxylaceae       | <i>Daldinia childiae</i><br>(KU683757)          | 521/522<br>(99.8%) |
| E-A48F2  | <i>Seimatosporium lichenicola</i> | Amphisphaeriaceae  | <i>Discostroma fuscillum</i><br>(JF320818)      | 538/540<br>(99.6%) |
| E-A48F3  | <i>Seimatosporium lichenicola</i> | Amphisphaeriaceae  | <i>Discostroma fuscillum</i><br>(JF320818)      | 547/553<br>(98.9%) |
| E-A48F4  | <i>Daldinia childiae</i>          | Hypoxylaceae       | <i>Daldinia childiae</i><br>(KU683757)          | 521/522<br>(99.8%) |
| E-A48F6  | <i>Phyllosticta pyrolae</i>       | Phyllostictaceae   | <i>Phyllosticta pyrolae</i><br>(AF312010)       | 583/591<br>(98.6%) |
| E-A48F7  | <i>Hypoxylon perforatum</i>       | Hypoxylaceae       | <i>Hypoxylon perforatum</i><br>(JQ009306)       | 552/562<br>(98.2%) |
| E-A48F9  | <i>Whalleya microplaca</i>        | Xylariaceae        | <i>Whalleya microplaca</i><br>(EF026129)        | 548/550<br>(99.6%) |
| E-A48F10 | <i>Daldinia childiae</i>          | Hypoxylaceae       | <i>Daldinia childiae</i><br>(KU683757)          | 521/522<br>(99.8%) |
| E-A48F12 | <i>Alternaria alternata</i>       | Pleosporaceae      | <i>Alternaria alternata</i><br>(KX064976)       | 510/510<br>(100%)  |
| E-A48F13 | <i>Seimatosporium lichenicola</i> | Amphisphaeriaceae  | <i>Seimatosporium lichenicola</i><br>(MF069255) | 528/530<br>(99.6%) |
| E-A49F1  | <i>Whalleya microplaca</i>        | Xylariaceae        | <i>Whalleya microplaca</i><br>(EF026129)        | 512/519<br>(98.7%) |
| E-A49F2  | <i>Hypoxylon perforatum</i>       | Hypoxylaceae       | <i>Hypoxylon perforatum</i><br>(KY950447)       | 575/580<br>(99.1%) |
| E-A50F1  | <i>Diplodia seriata</i>           | Botryosphaeriaceae | <i>Diplodia seriata</i><br>(KR822800)           | 516/518<br>(99.6%) |
| F-A51F1  | <i>Didymella</i> sp.              | Didymellaceae      | <i>Didymella</i> sp.<br>(MF065737)              | 488/491<br>(99.4%) |
| F-A51F2  | <i>Pestalotiopsis hainanensis</i> | Sporocadaceae      | <i>Pestalotiopsis hainanensis</i>               | 540/540<br>(100%)  |

|         |                                     |                              |                                                   |                    |
|---------|-------------------------------------|------------------------------|---------------------------------------------------|--------------------|
|         |                                     |                              | (KF551573)                                        |                    |
| F-A51F3 | <i>Daldinia childiae</i>            | Hypoxylaceae                 | <i>Daldinia childiae</i><br>KU683757              | 522/531<br>(98.3%) |
| F-A51F4 | <i>Didymella</i> sp.                | Didymellaceae                | <i>Didymella</i> sp.<br>(MF065737)                | 495/495<br>(100%)  |
| F-A51F5 | <i>Nothophoma quercina</i>          | Didymellaceae                | <i>Nothophoma quercina</i><br>(LT592929)          | 490/490<br>(100%)  |
| F-A52F1 | <i>Paraconiothyrium brasiliense</i> | Didymosphaeriaceae           | <i>Paraconiothyrium Brasiliense</i><br>(JF439492) | 552/552<br>(100%)  |
| F-A52F2 | Fungal sp.                          | Unassigned                   | Uncultured fungus<br>clone<br>(MF976687)          | 465/519<br>(89.6%) |
| F-A53F1 | <i>Nigrospora sphaerica</i>         | Trichosphaeriaceae           | <i>Nigrospora sphaerica</i><br>(KF171529)         | 501/501<br>(100%)  |
| F-A53F2 | <i>Hypoxylon</i> sp.                | Hypoxylaceae                 | <i>Hypoxylon</i> sp.<br>(JQ761682)                | 611/617<br>(99%)   |
| F-A54F1 | <i>Xylaria</i> sp.                  | Xylariaceae                  | <i>Xylaria arbuscular</i><br>(MG004732)           | 482/500<br>(96.4%) |
| F-A54F2 | <i>Pleosporales</i> sp.             | Unclassified<br>Pleosporales | <i>Pleosporales</i> sp.<br>(KX148623)             | 429/440<br>(97.5%) |
| F-A54F3 | <i>Valsa sordida</i>                | Valsaceae                    | <i>Cytospora chrysosperma</i><br>(KJ739458)       | 561/570<br>(98.4%) |
| F-A54F4 | <i>Didymella</i> sp.                | Didymellaceae                | <i>Didymella</i> sp.<br>(MF065737)                | 491/492<br>(99.8%) |
| F-A54F5 | <i>Hypoxylon perforatum</i>         | Hypoxylaceae                 | <i>Hypoxylon perforatum</i><br>(FJ464593)         | 575/580<br>(99.1%) |
| F-A55F1 | <i>Coniothyrium</i> sp.             | Coniothyriaceae              | <i>Coniothyrium</i> sp.<br>(KY047484)             | 488/488<br>(100%)  |
| F-A55F2 | <i>Nothophoma quercina</i>          | Didymellaceae                | <i>Nothophoma quercina</i><br>(LT592929)          | 488/488<br>(100%)  |
| F-A61F1 | <i>Didymella glomerata</i>          | Didymellaceae                | <i>Didymella glomerata</i><br>(KX064999)          | 490/490<br>(100%)  |
| F-A61F2 | <i>Seimatosporium lichenicola</i>   | Amphisphaeriaceae            | <i>Seimatosporium lichenicola</i><br>(KT000158)   | 514/518<br>(99.2%) |

|                |                                  |                           |                                             |                 |
|----------------|----------------------------------|---------------------------|---------------------------------------------|-----------------|
| <b>F-A61F3</b> | <i>Ascochyta medicaginicola</i>  | Didymellaceae             | <i>Phoma medicaginis</i> (KT192351)         | 490/490 (100%)  |
| <b>F-A61F4</b> | <i>Pestalotiopsis microspora</i> | Sporocadaceae             | <i>Pestalotiopsis microspore</i> (KM438014) | 498/498 (100%)  |
| <b>F-A62F1</b> | <i>Didymosphaeria variabile</i>  | Didymosphaeriaceae        | <i>Didymosphaeria variabile</i> (KX869961)  | 555/555 (100%)  |
| <b>F-A63F1</b> | <i>Didymella glomerata</i>       | Didymellaceae             | <i>Didymella glomerata</i> (KX064999)       | 490/491 (99.8%) |
| <b>F-A63F2</b> | <i>Didymella glomerata</i>       | Didymellaceae             | <i>Didymella glomerata</i> (KX064999)       | 492/492 (100%)  |
| <b>F-A63F3</b> | <i>Ascochyta medicaginicola</i>  | Didymellaceae             | <i>Ascochyta medicaginicola</i> (KX064990)  | 491/491 (100%)  |
| <b>F-A64F1</b> | <i>Epicoccum nigrum</i>          | Didymellaceae             | <i>Epicoccum nigrum</i> (EU821486)          | 491/491 (100%)  |
| <b>F-A64F3</b> | <i>Didymella</i> sp.             | Didymellaceae             | <i>Didymella</i> sp. (MF065737)             | 496/496 (100%)  |
| <b>F-A64F5</b> | <i>Coniothyrium</i> sp.          | Coniothyriaceae           | <i>Coniothyrium</i> sp. (KY047484)          | 490/490 (100%)  |
| <b>F-A64F6</b> | <i>Cytospora</i> sp.             | Valsaceae                 | <i>Cytospora</i> sp. (KC342485)             | 549/557 (98.6%) |
| <b>G-A66F1</b> | <i>Didymosphaeria variabile</i>  | Didymosphaeriaceae        | <i>Didymosphaeria variabile</i> (KX869961)  | 547/548 (99.8%) |
| <b>G-A66F2</b> | <i>Pestalotiopsis</i> sp.        | Sporocadaceae             | <i>Pestalotiopsis</i> sp. (KX343175)        | 541/542 (99.8%) |
| <b>G-A66F3</b> | <i>Ascochyta medicaginicola</i>  | Didymellaceae             | <i>Ascochyta medicaginicola</i> (KX064990)  | 500/500 (100%)  |
| <b>G-A67F2</b> | <i>Didymella glomerata</i>       | Didymellaceae             | <i>Didymella glomerata</i> (MG372318)       | 491/491 (100%)  |
| <b>G-A67F3</b> | <i>Didymella glomerata</i>       | Didymellaceae             | <i>Peyronellaea glomerata</i> (KT192211)    | 480/482 (99.6%) |
| <b>G-A67F4</b> | <i>Pleosporales</i> sp.          | unclassified Pleosporales | <i>Pleosporales</i> sp. (KR909157)          | 510/516 (98.8%) |
| <b>G-A68F1</b> | <i>Ascochyta medicaginicola</i>  | Didymellaceae             | <i>Ascochyta medicaginicola</i> (KX065046)  | 490/490 (100%)  |



|         |                                  |                    |                                                |                    |
|---------|----------------------------------|--------------------|------------------------------------------------|--------------------|
| G-A68F2 | <i>Pestalotiopsis mangiferae</i> | Sporocadaceae      | <i>Pestalotiopsis mangiferae</i><br>(JX305692) | 478/478<br>(100%)  |
| G-A68F3 | <i>Ceuthospora pinastri</i>      | Phacidiaceae       | <i>Ceuthospora pinastri</i><br>(FR717225)      | 486/494<br>(98.4%) |
| G-A68F4 | <i>Pestalotiopsis</i> sp.        | Sporocadaceae      | <i>Pestalotiopsis</i> sp.<br>(JN418796)        | 492/494<br>(99.6%) |
| G-A69F1 | <i>Dothideales</i> sp.           | Unassigned         | <i>Dothideales</i> sp.<br>(JX188157)           | 520/537<br>(96.8%) |
| G-A70F1 | <i>Coniothyrium</i> sp.          | Coniothyriaceae    | <i>Coniothyrium</i> sp.<br>(KY047484)          | 489/489<br>(100%)  |
| G-A70F2 | <i>Nothophoma quercina</i>       | Didymellaceae      | <i>Nothophoma quercina</i><br>(LT592929)       | 488/488<br>(100%)  |
| G-A71F1 | <i>Ascochyta medicaginicola</i>  | Didymellaceae      | <i>Ascochyta medicaginicola</i><br>(KX065046)  | 496/496<br>(100%)  |
| G-A71F2 | <i>Phoma aliena</i>              | Didymellaceae      | <i>Phoma aliena</i><br>(KX869951)              | 500/500<br>(100%)  |
| G-A71F3 | <i>Nigrospora sphaerica</i>      | Trichosphaeriaceae | <i>Nigrospora sphaerica</i><br>(KF171529)      | 502/503<br>(99.8%) |
| G-A72F1 | <i>Nothophoma quercina</i>       | Didymellaceae      | <i>Nothophoma quercina</i><br>(LT592929)       | 482/485<br>(99.4%) |
| G-A72F2 | <i>Didymella</i> sp.             | Didymellaceae      | <i>Didymella</i> sp.<br>(MF065737)             | 477/490<br>(97.4%) |
| G-A72F3 | <i>Nothophoma quercina</i>       | Didymellaceae      | <i>Nothophoma quercina</i><br>(KU973713)       | 497/499<br>(99.6%) |
| H-A56F1 | <i>Pestalotiopsis microspora</i> | Sporocadaceae      | <i>Pestalotiopsis microspora</i><br>(KM041703) | 491/495<br>(99.2%) |
| H-A56F4 | <i>Phoma aliena</i>              | Didymellaceae      | <i>Phoma aliena</i><br>(KX869951)              | 500/500<br>(100%)  |
| H-A56F5 | <i>Diplodia seriata</i>          | Botryosphaeriaceae | <i>Diplodia seriata</i><br>(KY385656)          | 535/536<br>(99.8%) |
| H-A56F6 | <i>Ascochyta medicaginicola</i>  | Didymellaceae      | <i>Ascochyta medicaginicola</i><br>(KX064990)  | 503/505<br>(99.6%) |
| H-A56F7 | <i>Pestalotiopsis vismiae</i>    | Sporocadaceae      | <i>Pestalotiopsis vismiae</i><br>(KM513583)    | 559/562<br>(99.5%) |

|         |                                               |                    |                                                             |                    |
|---------|-----------------------------------------------|--------------------|-------------------------------------------------------------|--------------------|
| H-A57F1 | <i>Cytospora</i> sp.                          | Valsaceae          | <i>Cytospora sophorae</i><br>(KC880147)                     | 532/549<br>(96.9%) |
| H-A57F2 | <i>Cytospora</i> sp.                          | Valsaceae          | <i>Cytospora sophorae</i><br>(KC880147)                     | 548/559<br>(98%)   |
| H-A57F3 | <i>Didymosphaeria</i><br><i>variabile</i>     | Didymosphaeriaceae | <i>Didymosphaeria</i><br><i>variabile</i><br>(KX869961)     | 556/556<br>(100%)  |
| H-A57F6 | <i>Seiridium</i> sp.                          | Sporocadaceae      | <i>Seiridium</i> sp.<br>(JN198507)                          | 521/529<br>(98.5%) |
| H-A57F7 | <i>Pestalotiopsis</i><br><i>vismiae</i>       | Sporocadaceae      | <i>Pestalotiopsis vismiae</i><br>(KM513583)                 | 541/541<br>(100%)  |
| H-A57F8 | <i>Didymosphaeria</i><br><i>variabile</i>     | Didymosphaeriaceae | <i>Didymosphaeria</i><br><i>variabile</i><br>(KX869961)     | 567/569<br>(99.6%) |
| H-A58F1 | <i>Didymosphaeria</i><br><i>variabile</i>     | Didymosphaeriaceae | <i>Didymosphaeria</i><br><i>variabile</i><br>(KX869961)     | 563/563<br>(100%)  |
| H-A58F2 | <i>Hypoxylon</i><br><i>perforatum</i>         | Hypoxylaceae       | <i>Hypoxylon</i><br><i>perforatum</i><br>(JQ009306)         | 564/565<br>(99.8%) |
| H-A58F3 | <i>Hypoxylon</i><br><i>perforatum</i>         | Hypoxylaceae       | <i>Hypoxylon</i><br><i>perforatum</i><br>(JQ009306)         | 574/578<br>(99.3%) |
| H-A59F1 | <i>Paraconiothyrium</i><br><i>brasiliense</i> | Didymosphaeriaceae | <i>Paraconiothyrium</i><br><i>Brasiliense</i><br>(JF439492) | 562/562<br>(100%)  |
| H-A59F2 | <i>Didymella</i><br><i>glomerata</i>          | Didymellaceae      | <i>Didymella glomerata</i><br>(KX064999)                    | 490/490<br>(100%)  |
| H-A59F3 | <i>Phoma</i> sp.                              | Didymellaceae      | <i>Phoma</i> sp.<br>(FJ949079)                              | 508/509<br>(99.8%) |
| H-A59F4 | <i>Ceuthospora</i><br><i>pinastri</i>         | Phacidiaceae       | <i>Ceuthospora</i><br><i>pinastri</i><br>(FR717225)         | 504/509<br>(99%)   |
| H-A60F2 | <i>Pestalotiopsis</i> sp.                     | Sporocadaceae      | <i>Pestalotiopsis</i> sp.<br>(KP217176)                     | 508/509<br>(99.8%) |
| H-A60F3 | <i>Microdiplodia</i> sp.                      | Botryosphaeriaceae | <i>Microdiplodia</i> sp.<br>(KM877481)                      | 547/548<br>(99.8%) |
