# Supplementary material for: Endophytic Fungi Residing within Cornus florida L. in Mid-Tennessee: Phylogenetic Diversity, Enzymatic Properties, and Potential Role in Plant Health
Source: MDPI journal article supplement (doi:10.3390/plants13091250), 2024-04-30
Supplement: s1 [file s1]

**Supplementary Table S3:** Pathogenicity test of endophytic fungi isolated from healthy *Cornus florida*.

| Endophytic fungi                  | Code    | Pathogenic/Non-pathogenic |
|-----------------------------------|---------|---------------------------|
| <i>Hypoxylon</i> sp.              | A-A4F2  | Non-pathogenic            |
| <i>Hypoxylon perforatum</i>       | A-A5F1  | Non-pathogenic            |
| <i>Seimatosporium lichenicola</i> | A-A7F1  | Non-pathogenic            |
| <i>Botryosphaeria dothidea</i>    | A-A8F1  | Pathogenic                |
| <i>Pestalotiopsis microspora</i>  | A-A8F2  | Pathogenic                |
| <i>Polyporales</i> sp.            | A-A9F1  | Non-pathogenic            |
| <i>Cytospora</i> sp.              | A-A9F2  | Non-pathogenic            |
| <i>Bjerkandera adusta</i>         | A-A10F1 | Non-pathogenic            |
| <i>Didymosphaeria variabile</i>   | B-A11F1 | Pathogenic                |
| <i>Daldinia childiae</i>          | B-A12F1 | Non-pathogenic            |
| <i>Hypoxylon rubiginosum</i>      | B-A12F2 | Non-pathogenic            |
| <i>Nemania</i> sp.                | B-A13F1 | Non-pathogenic            |
| <i>Didymosphaeria variabile</i>   | B-A15F1 | Non-pathogenic            |
| <i>Whalleya microplaca</i>        | B-A17F1 | Non-pathogenic            |
| <i>Rosellinia corticium</i>       | B-A17F2 | Pathogenic                |
| <i>Xylaria</i> sp.                | B-A19F1 | Pathogenic                |
| <i>Hypoxylon perforatum</i>       | B-A20F1 | Pathogenic                |
| <i>Hypoxylon howeanum</i>         | B-A20F2 | Non-pathogenic            |
| <i>Seimatosporium lichenicola</i> | C-A21F1 | Non-pathogenic            |
| <i>Dothideales</i> sp.            | C-A21F2 | Non-pathogenic            |
| <i>Nigrospora sphaerica</i>       | C-A22F1 | Non-pathogenic            |
| <i>Hypoxylon perforatum</i>       | C-A22F2 | Non-pathogenic            |
| <i>Peniophora lycii</i>           | C-A22F3 | Non-pathogenic            |
| <i>Hypoxylon fuscum</i>           | C-A23F2 | Non-pathogenic            |
| <i>Pestalotiopsis</i> sp.         | C-A24F1 | Non-pathogenic            |
| <i>Hypoxylon submonticulosum</i>  | C-A26F3 | Non-pathogenic            |
| <i>Hypoxylon perforatum</i>       | C-A26F4 | Non-pathogenic            |

|                                       |          |                |
|---------------------------------------|----------|----------------|
| <i>Hypoxylon rubiginosum</i>          | C-A26F5  | Non-pathogenic |
| <i>Hypoxylon</i> sp.                  | C-A26F8  | Non-pathogenic |
| <i>Hypoxylon perforatum</i>           | C-A27F1  | Non-pathogenic |
| <i>Ascochyta medicaginicola</i>       | C-A27F2  | Non-pathogenic |
| <i>Cladosporium cladosporioides</i>   | C-A28F1  | Non-pathogenic |
| <i>Xylaria</i> cf. <i>heliscus</i>    | C-A30F1  | Non-pathogenic |
| <i>Mycosphaerella aurantia</i>        | D-A31F2  | Non-pathogenic |
| <i>Coniozyma</i> sp.                  | D-A32F1  | Non-pathogenic |
| <i>Daldinia childiae</i>              | D-A33F1  | Non-pathogenic |
| <i>Daldinia childiae</i>              | D-A33F4  | Non-pathogenic |
| <i>Diplodia seriata</i>               | D-A34F1  | Non-pathogenic |
| <i>Hypoxylon perforatum</i>           | D-A35F1  | Non-pathogenic |
| <i>Hypoxylon perforatum</i>           | D-A35F2  | Non-pathogenic |
| <i>Hypoxylon</i> sp.                  | D-A35F3  | Non-pathogenic |
| <i>Didymosphaeria variabile</i>       | D-A37F1  | Non-pathogenic |
| <i>Xylaria</i> sp.                    | D-A37F2  | Non-pathogenic |
| <i>Daldinia childiae</i>              | D-A38F1  | Non-pathogenic |
| <i>Annulohypoxylon annulatum</i>      | D-A40F1  | Non-pathogenic |
| <i>Nemania serpens</i>                | D-A40F2  | Pathogenic     |
| <i>Hypoxylon submonticulosum</i>      | D-A40F3  | Non-pathogenic |
| <i>Colletotrichum acutatum</i>        | E-A41F1  | Pathogenic     |
| <i>Hypoxylon</i> sp.                  | E-A41F3  | Non-pathogenic |
| <i>Colletotrichum gloeosporioides</i> | E-A41F4  | Pathogenic     |
| <i>Diplodia seriata</i>               | E-A43F4  | Pathogenic     |
| <i>Pestalotiopsis microspora</i>      | E-A44F1  | Pathogenic     |
| <i>Stereum complicatum</i>            | E-A44F3  | Non-pathogenic |
| <i>Phyllosticta pyrolae</i>           | E-A48F6  | Non-pathogenic |
| <i>Whalleya microplaca</i>            | E-A48F9  | Non-pathogenic |
| <i>Alternaria alternata</i>           | E-A48F12 | Pathogenic     |
| <i>Diplodia seriata</i>               | E-A50F1  | Pathogenic     |
| <i>Daldinia childiae</i>              | F-A51F3  | Pathogenic     |

|                                 |         |                |
|---------------------------------|---------|----------------|
| <i>Didymella</i> sp.            | F-A54F4 | Non-pathogenic |
| <i>Coniothyrium</i> sp.         | F-A55F1 | Non-pathogenic |
| <i>Phoma aliena</i>             | H-A56F4 | Pathogenic     |
| <i>Cytospora</i> sp.            | H-A57F2 | Non-pathogenic |
| <i>Didymella glomerata</i>      | F-A61F1 | Pathogenic     |
| <i>Ascochyta medicaginicola</i> | F-A61F3 | Non-pathogenic |
| <i>Epicoccum nigrum</i>         | F-A64F1 | Non-pathogenic |
